# Supplementary material for: Effect of the hole transport layer on the performance of sky-blue Dion–Jacobson perovskite light-emitting diodes
Source: Royal Society of Chemistry journal article supplement (doi:10.1039/d3tc02546b), 2023-01-01
Supplement: d3tc02546b1.pdf [file d3tc02546b1.pdf]

## SUPPLEMENTARY INFORMATION

# Effects of hole transport layer on the performance of sky-blue Dion-Jacobson perovskite light-emitting diodes

Wen Ting Sun,<sup>1</sup> Yanling He,<sup>1</sup> Muhammad Umair Ali,<sup>1</sup> Qiye Liu,<sup>2</sup> Hongbo Mo,<sup>1</sup> Sijia Wang,<sup>3</sup> Alan Man Ching Ng,<sup>4</sup> and Aleksandra B. Djurišić<sup>1,\*</sup>

<sup>1</sup> Department of Physics, The University of Hong Kong, Pokfulam Road, Hong Kong

<sup>2</sup> Shenzhen Institute for Quantum Science and Engineering, and Department of Physics, Southern University of Science and Technology, Shenzhen 518055, China

<sup>3</sup> Department of Mechanical Engineering, The University of Hong Kong, Pokfulam Road, Hong Kong

<sup>4</sup> Core Characterization Facility, Southern University of Science and Technology, No. 1088, Xueyuan Rd., Shenzhen, 518055, Guangdong, PR China.

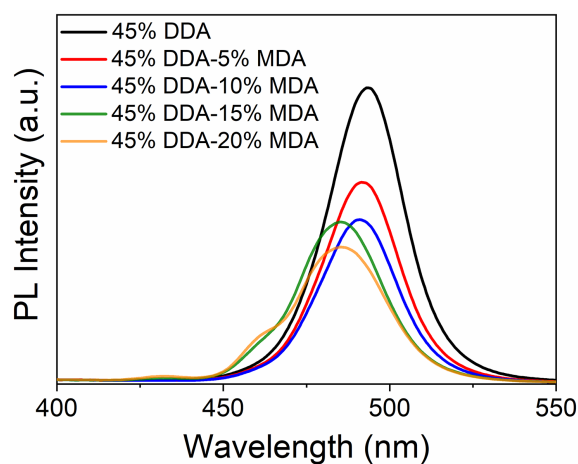

**Figure S1.** PL spectra of perovskites with 45% DDABr<sub>2</sub> and different content of MDABr<sub>2</sub>.

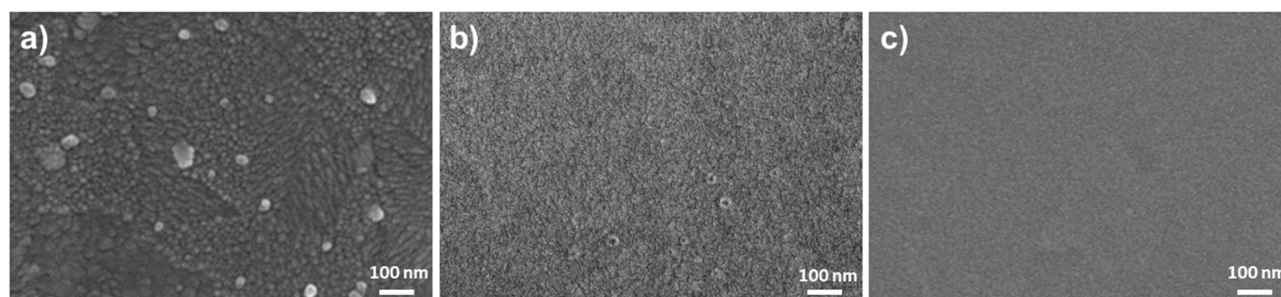

**Figure S2.** SEM images of DDA-MDA perovskite on different HTLs: a) 2PACz, b) 2PACz/PVK and c) 2PACz/PVK/TSPO1.

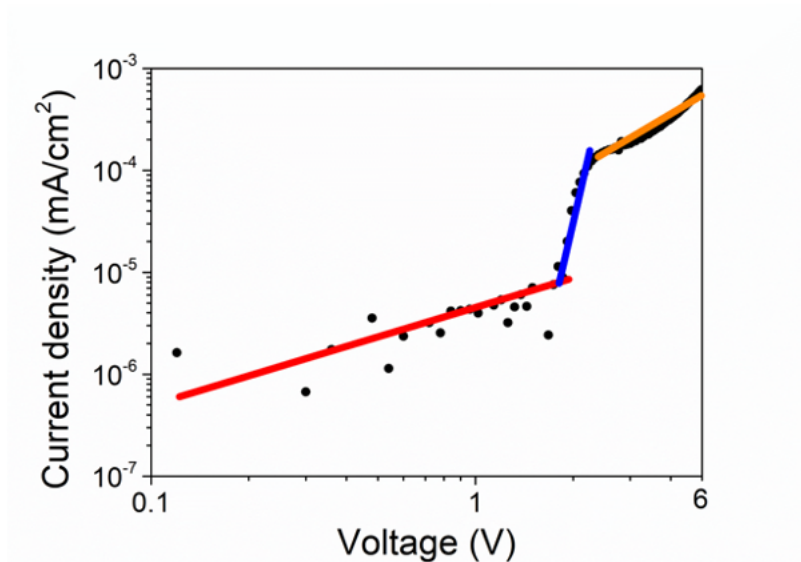

**Figure S3.** Space-charge-limited current (SCLC) measurement of electron-only device with the architecture ITO/SnO<sub>2</sub>/PEIE/DDA-MDA perovskite/TPBi/Liq/Al.

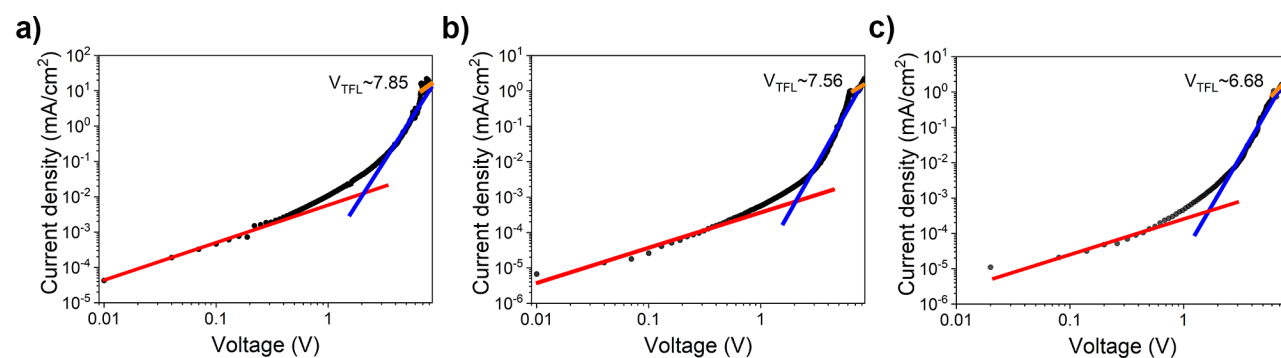

**Figure S4.** SCLC measurement of DDA-MDA perovskite-based LED devices with different HTLs: a) 2PACz, b) 2PACz/PVK, and c) 2PACz/PVK/TSP01. Device architecture was ITO/HTL/Perovskite/CBP/MoO<sub>x</sub>/Al, where CBP denotes 4,4'-bis(N-carbazolyl)-1,1'-biphenyl.

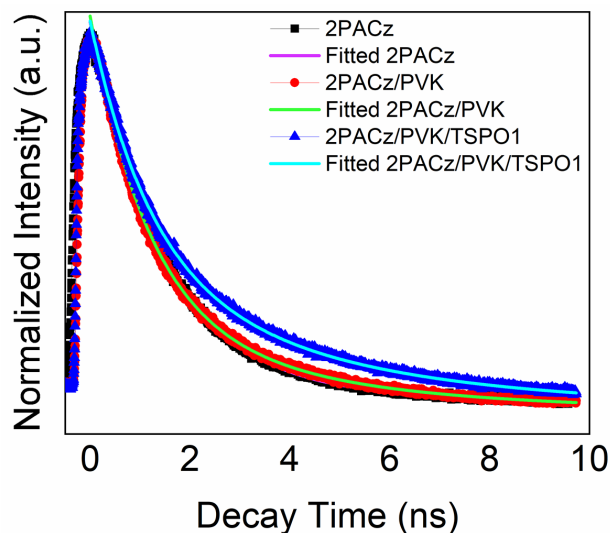

**Figure S5.** TRPL decay curves of perovskite films on different HTLs.

**Table S1.** Fitting parameters of TRPL curves to exponential decay model described as  $I(t) = \sum_i^n A_i \exp(-t/\tau_i)$ , with average decay time calculated as  $\tau_{avg} = \sum_i^n A_i \tau_i / \sum_i^n A_i$ .

| HTL             | $A_1$ | $\tau_1$ (ns) | $A_2$ | $\tau_2$ (ns) | $\tau_{avg}$ (ns) |
|-----------------|-------|---------------|-------|---------------|-------------------|
| 2PACz           | 0.94  | 1.52          | -     | -             | 1.52              |
| 2PACz/PVK       | 0.75  | 1.16          | 0.23  | 4.00          | 1.83              |
| 2PACz/PVK/TSPO1 | 0.60  | 1.18          | 0.36  | 4.26          | 2.34              |

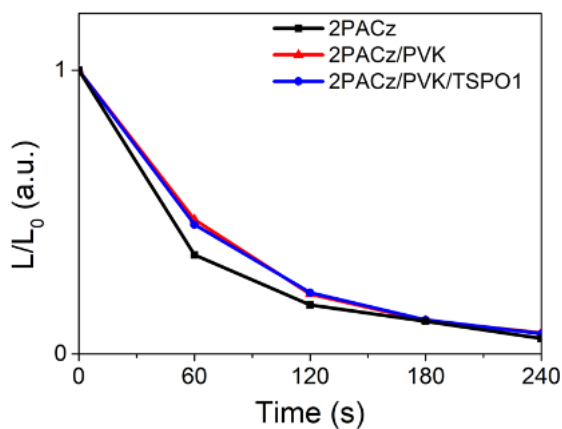

**Figure S6.** The luminance of devices as a function of time at a fixed current bias of 0.2 mA (corresponding to initial luminance in the range 90-99  $\text{cd}/\text{m}^2$ ).

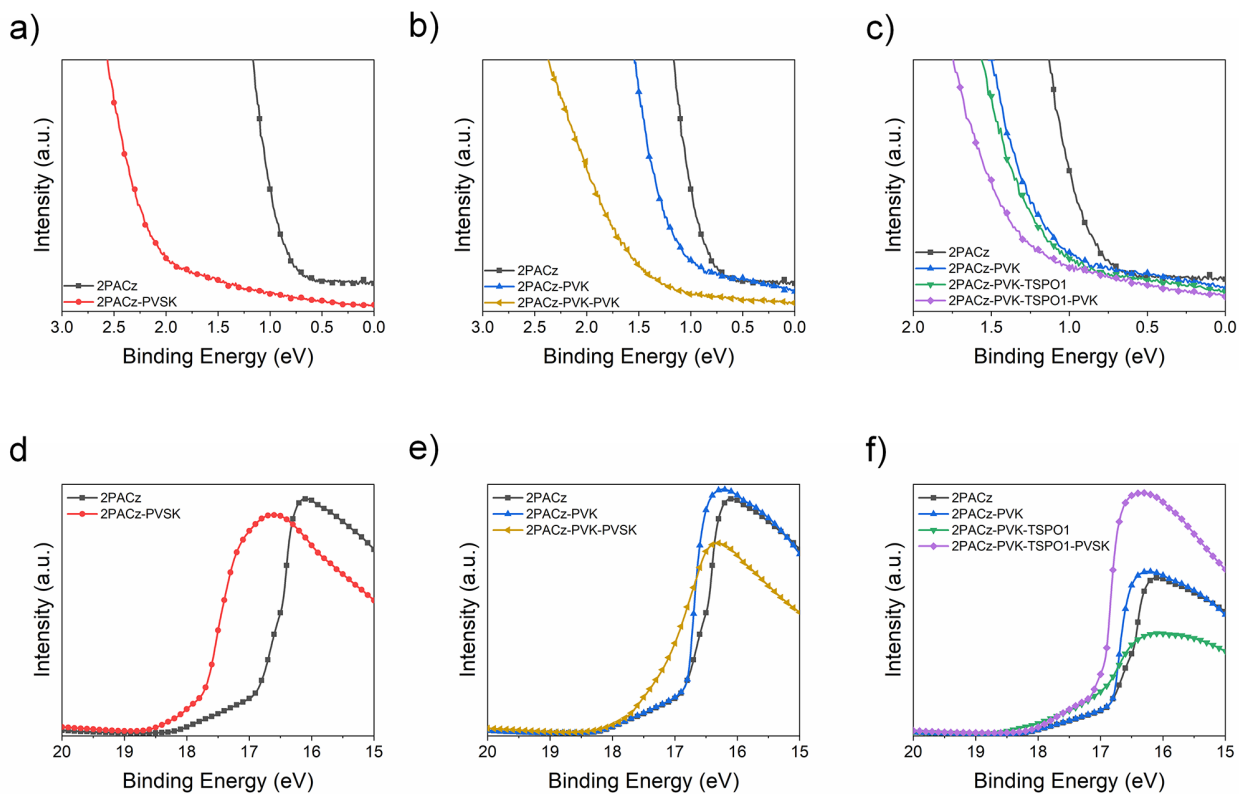

**Figure S7.** a) Fermi edge of 2PACz and 2PACz/PVSK, b) Fermi edge of 2PACz, 2PACz/PVK and 2PACz/PVK/PVSK, c) Fermi edge of 2PACz, 2PACz/PVK, 2PACz/PVK/TSP01 and 2PACz/PVK/TSP01/PVSK, d) SE Cut-off of 2PACz and 2PACz/PVSK, e) SE Cut-off of 2PACz, 2PACz/PVK and 2PACz/PVK/PVSK and f) SE Cut-off of 2PACz, 2PACz/PVK, 2PACz/PVK/TSP01 and 2PACz/PVK/TSP01/PVSK.
